# Supplementary material for: Ultra-clean and smoky marine boundary layers frequently occur inthe same season over the southeast Atlantic
Source: Copernicus journal article supplement (doi:10.5194/acp-2019-628), 2019-07-15
Supplement: Supplementary file 1 [file acp-2019-628-supplement.pdf]

## Supplemental Figures

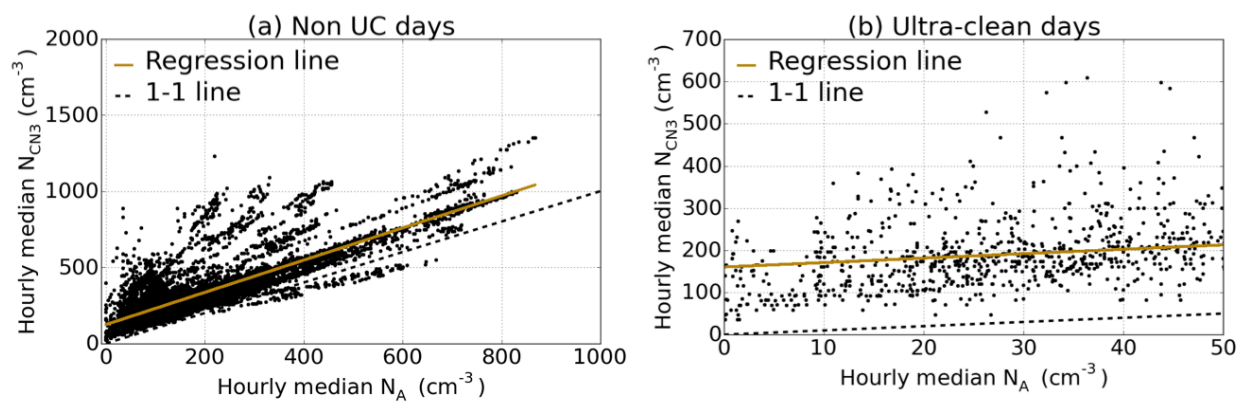

**Figure S1:** Hourly median  $N_{CN3}$  is regressed against hourly median  $N_A$  for both (a) non ultra-clean days and (b) ultra-clean days.
